# Supplementary material
Source: PubMed Central journal article supplement (PMC2745945)
Supplement: NIHMS106170-supplement-supp.pdf [file NIHMS106170-supplement-supp.pdf]

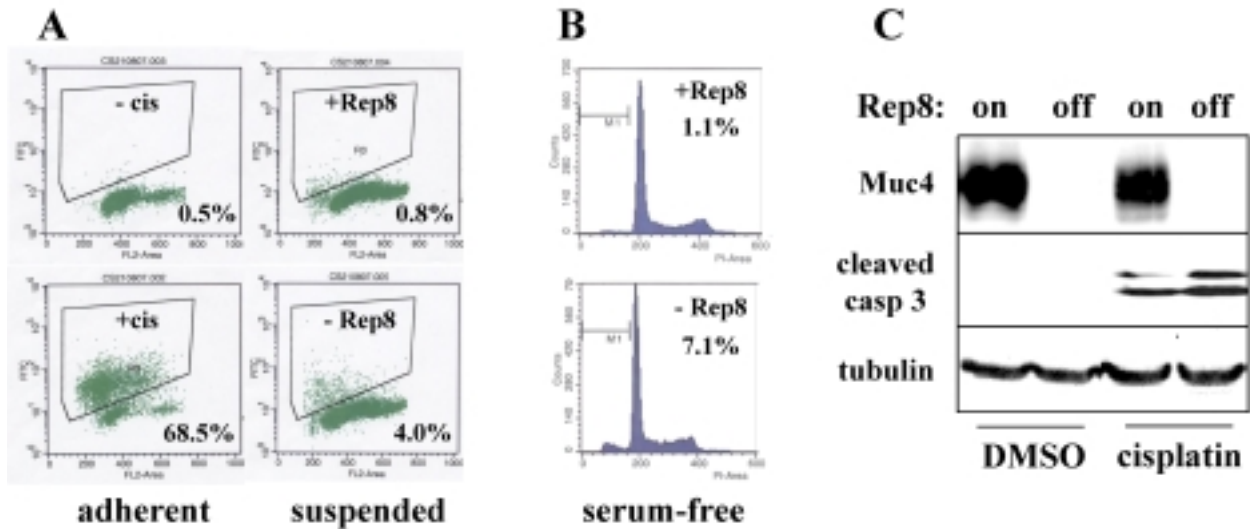

Supplementary Fig 1. Analysis methods of Muc4-mediated cellular survival. *A*, As a control, adherent A375-Rep8 cells with Rep8 expression turned off were treated overnight without and with 12.5 mg/ml cisplatin to efficiently induce apoptosis, cells were analyzed by TUNEL followed by FACS, and gating parameters (box) for apoptotic cells were established (left two panels). To examine Muc4-induced survival, suspended A375-Rep8 cells with Rep8 turned on or off as indicated were similarly analyzed by TUNEL/FACS, and the percentage of apoptotic cells was determined (right two panels). *B*, Adherent A375-Rep8 cells with Rep8 turned on or off were grown in serum-free media for 48 hours, and analyzed by FACS after propidium iodide staining. The percent of sub-G<sub>1</sub> cells is indicated. *C*, Adherent A375-Rep8 cells with Rep8 turned on and off were treated for 18 hours with vehicle or 5.5 mg/ml cisplatin. Cell lysates were blotted with antibodies to Muc4, cleaved caspase 3 and tubulin.
